# Supplementary material for: The microbiomes of seven lichen genera reveal host specificity, a reduced core community and potential as source of antimicrobials
Source: bioRxiv or medRxiv preprint supplement (doi:10.1101/789032), 2019-10-01
Supplement: Supplementary file [file media-1.pdf]

| Sample_code | Location | GPS                      | Lichen_Genus        | Sustrate |
|-------------|----------|--------------------------|---------------------|----------|
| Cl_a_B_Nev  | Nevados  | N 4.860833° W 75.361944° | <i>Cladonia</i>     | TER      |
| Cl_a_C_Nev  | Nevados  | N 4.909528° W 75.353694° | <i>Cladonia</i>     | TER      |
| Cl_a_D_Nev  | Nevados  | N 4.933056° W 75.355000° | <i>Cladonia</i>     | COR      |
| Cl_a_E_Nev  | Nevados  | N 4.968523° W 75.352512° | <i>Cladonia</i>     | TER      |
| Cl_a_F_Nev  | Nevados  | N 4.970833° W 75.351944° | <i>Cladonia</i>     | TER      |
| Co_B_Nev    | Nevados  | N 4.860833° W 75.361944° | <i>Cora</i>         | TER      |
| Co_F_Nev    | Nevados  | N 4.970833° W 75.351944° | <i>Cora</i>         | TER      |
| Hyp_C_Nev   | Nevados  | N 4.909528° W 75.353694° | <i>Hypotrachyna</i> | COR      |
| Hyp_E_Nev   | Nevados  | N 4.968523° W 75.352512° | <i>Hypotrachyna</i> | COR      |
| Hyp_F_Nev   | Nevados  | N 4.970833° W 75.351944° | <i>Hypotrachyna</i> | COR      |
| Ptg_F_Nev   | Nevados  | N 4.970833° W 75.351944° | <i>Peltigera</i>    | TER      |
| Stc_A_Nev   | Nevados  | N 4.852778° W 75.364722° | <i>Stereocaulon</i> | TER      |
| Stc_B_Nev   | Nevados  | N 4.860833° W 75.361944° | <i>Stereocaulon</i> | TER      |
| Stc_D_Nev   | Nevados  | N 4.933056° W 75.355000° | <i>Stereocaulon</i> | TER      |
| Stc_F_Nev   | Nevados  | N 4.970833° W 75.351944° | <i>Stereocaulon</i> | TER      |
| Stt_C_Nev   | Nevados  | N 4.909528° W 75.353694° | <i>Sticta</i>       | COR      |
| Stt_D_Nev   | Nevados  | N 4.933056° W 75.355000° | <i>Sticta</i>       | TER      |
| Us_A_Nev    | Nevados  | N 4.852778° W 75.364722° | <i>Usnea</i>        | COR      |
| Us_C_Nev    | Nevados  | N 4.909528° W 75.353694° | <i>Usnea</i>        | COR      |
| Us_D_Nev    | Nevados  | N 4.933056° W 75.355000° | <i>Usnea</i>        | COR      |
| Us_E_Nev    | Nevados  | N 4.968523° W 75.352512° | <i>Usnea</i>        | COR      |
| Cl_a_A_Chi  | Chingaza | N 4.71470° W 73.82208°   | <i>Cladonia</i>     | SAX      |
| Cl_a_K1_Chi | Chingaza | N 4.67727° W 73.78642°   | <i>Cladonia</i>     | TER      |
| Cl_a_K2_Chi | Chingaza | N 4.67727° W 73.78642°   | <i>Cladonia</i>     | TER      |
| Cl_a_L_Chi  | Chingaza | N 4.67766° W 73.78671°   | <i>Cladonia</i>     | TER      |
| Co_A_Chi    | Chingaza | N 4.71470° W 73.82208°   | <i>Cora</i>         | SAX      |
| Co_H1_Chi   | Chingaza | N 4.62904° W 73.67063°   | <i>Cora</i>         | COR      |
| Co_H2_Chi   | Chingaza | N 4.62904° W 73.67063°   | <i>Cora</i>         | COR      |
| Co_I_Chi    | Chingaza | N 4.62377° W 73.72462°   | <i>Cora</i>         | TER      |
| Co_L_Chi    | Chingaza | N 4.67766° W 73.78671°   | <i>Cora</i>         | TER      |
| Hyp_B_Chi   | Chingaza | N 4.62480° W 73.72694°   | <i>Hypotrachyna</i> | COR      |
| Hyp_H_Chi   | Chingaza | N 4.62904° W 73.67063°   | <i>Hypotrachyna</i> | TER      |
| Hyp_M_Chi   | Chingaza | N 4.68166° W 73.78699°   | <i>Hypotrachyna</i> | SAX      |
| Hyp_N_Chi   | Chingaza | N 4.68298° W 73.78704°   | <i>Hypotrachyna</i> | SAX      |
| Ptg_C_Chi   | Chingaza | N 4.62426° W 73.72611°   | <i>Peltigera</i>    | COR      |
| Ptg_N_Chi   | Chingaza | N 4.68298° W 73.78704°   | <i>Peltigera</i>    | SAX      |
| Stc_A_Chi   | Chingaza | N 4.71470° W 73.82208°   | <i>Stereocaulon</i> | SAX      |
| Stc_J_Chi   | Chingaza | N 4.68306° W 73.78687°   | <i>Stereocaulon</i> | SAX      |
| Stc_L_Chi   | Chingaza | N 4.67766° W 73.78671°   | <i>Stereocaulon</i> | TER      |
| Stt_A_Chi   | Chingaza | N 4.71470° W 73.82208°   | <i>Sticta</i>       | COR      |
| Stt_B_Chi   | Chingaza | N 4.62480° W 73.72694°   | <i>Sticta</i>       | COR      |
| Stt_C_Chi   | Chingaza | N 4.62426° W 73.72611°   | <i>Sticta</i>       | COR      |
| Stt_E_Chi   | Chingaza | N 4.62349° W 73.72566°   | <i>Sticta</i>       | COR      |
| Stt_F_Chi   | Chingaza | N 4.623400° W 73.725590° | <i>Sticta</i>       | COR      |
| Us_E_Chi    | Chingaza | N 4.62349° W 73.72566°   | <i>Usnea</i>        | COR      |
| Us_G_Chi    | Chingaza | N 4.62335° W 73.72551°   | <i>Usnea</i>        | COR      |
| Us_K_Chi    | Chingaza | N 4.67727° W 73.78642°   | <i>Usnea</i>        | COR      |
