# Supplementary material for: The microbiomes of seven lichen genera reveal host specificity, a reduced core community and potential as source of antimicrobials
Source: bioRxiv or medRxiv preprint supplement (doi:10.1101/789032), 2019-10-01
Supplement: Supplementary file [file media-2.pdf]

| Samples     | Lichen       | Observed | Shannon    | Simpson    |
|-------------|--------------|----------|------------|------------|
| Cl_a_A_Chi  | Cladonia     | 769      | 4.13345805 | 0.94352985 |
| Cl_a_B_Nev  | Cladonia     | 324      | 1.83803213 | 0.71642585 |
| Cl_a_C_Nev  | Cladonia     | 208      | 1.68723544 | 0.71813521 |
| Cl_a_D_Nev  | Cladonia     | 260      | 2.23916555 | 0.76769596 |
| Cl_a_E_Nev  | Cladonia     | 385      | 2.65079485 | 0.83552612 |
| Cl_a_F_Nev  | Cladonia     | 298      | 1.61505157 | 0.59386502 |
| Cl_a_K1_Chi | Cladonia     | 567      | 3.61279749 | 0.92669056 |
| Cl_a_K2_Chi | Cladonia     | 868      | 4.29626725 | 0.96763313 |
| Cl_a_L_Chi  | Cladonia     | 1106     | 4.58981752 | 0.96913622 |
| Co_A_Chi    | Cora         | 996      | 3.47136917 | 0.78522872 |
| Co_B_Nev    | Cora         | 201      | 1.68133916 | 0.68316316 |
| Co_F_Nev    | Cora         | 278      | 1.63636832 | 0.64028134 |
| Co_H1_Chi   | Cora         | 1312     | 4.57092575 | 0.93849366 |
| Co_H2_Chi   | Cora         | 767      | 3.29613314 | 0.83855433 |
| Co_I_Chi    | Cora         | 210      | 1.83993806 | 0.6572326  |
| Co_L_Chi    | Cora         | 758      | 3.22255803 | 0.8290168  |
| Hyp_B_Chi   | Hypotrachyna | 819      | 4.62616387 | 0.97363313 |
| Hyp_C_Nev   | Hypotrachyna | 619      | 2.29316784 | 0.58821926 |
| Hyp_E_Nev   | Hypotrachyna | 427      | 3.74761329 | 0.9548576  |
| Hyp_F_Nev   | Hypotrachyna | 782      | 4.73816764 | 0.97990882 |
| Hyp_H_Chi   | Hypotrachyna | 1924     | 5.61251287 | 0.9854916  |
| Hyp_M_Chi   | Hypotrachyna | 704      | 4.01967358 | 0.94366012 |
| Hyp_N_Chi   | Hypotrachyna | 1003     | 4.20067332 | 0.89489018 |
| Ptg_C_Chi   | Peltigera    | 1955     | 4.68707721 | 0.88646336 |
| Ptg_F_Nev   | Peltigera    | 433      | 2.02338715 | 0.63823252 |
| Ptg_N_Chi   | Peltigera    | 639      | 2.31384759 | 0.62289145 |
| Stc_A_Chi   | Stereocaulon | 661      | 3.43656293 | 0.87841948 |
| Stc_A_Nev   | Stereocaulon | 343      | 1.94275398 | 0.57475456 |
| Stc_B_Nev   | Stereocaulon | 843      | 3.58251167 | 0.85479688 |
| Stc_D_Nev   | Stereocaulon | 352      | 1.87980636 | 0.62319748 |
| Stc_F_Nev   | Stereocaulon | 220      | 1.75184541 | 0.7101174  |
| Stc_J_Chi   | Stereocaulon | 738      | 3.75418307 | 0.90163427 |
| Stc_L_Chi   | Stereocaulon | 882      | 4.38191555 | 0.95311243 |
| Stt_A_Chi   | Sticta       | 1611     | 4.45935331 | 0.86047591 |
| Stt_B_Chi   | Sticta       | 1078     | 3.89970208 | 0.82525909 |
| Stt_C_Chi   | Sticta       | 1418     | 5.24448878 | 0.98379839 |
| Stt_C_Nev   | Sticta       | 504      | 2.33674598 | 0.71590542 |
| Stt_D_Nev   | Sticta       | 476      | 1.7477335  | 0.56932314 |
| Stt_E_Chi   | Sticta       | 1197     | 5.10014433 | 0.98241538 |
| Stt_F_Chi   | Sticta       | 1633     | 5.39393032 | 0.98609535 |
| Us_A_Nev    | Usnea        | 100      | 0.56393615 | 0.20865696 |
| Us_C_Nev    | Usnea        | 189      | 0.89319927 | 0.26074171 |
| Us_D_Nev    | Usnea        | 425      | 2.23491125 | 0.77018313 |
| Us_E_Chi    | Usnea        | 763      | 3.19272753 | 0.73691332 |
| Us_E_Nev    | Usnea        | 177      | 2.20428949 | 0.69595366 |
| Us_G_Chi    | Usnea        | 318      | 2.68682305 | 0.87396244 |
| Us_K_Chi    | Usnea        | 185      | 2.06754498 | 0.77856529 |

Alpha

0.05

| <b>Tukey's multiple comparisons test</b> | <b>Mean Diff.</b> | <b>95.00% CI of diff.</b> | <b>Significant?</b> | <b>Summary</b> | <b>Adjusted P Value</b> |
|------------------------------------------|-------------------|---------------------------|---------------------|----------------|-------------------------|
| Cladonia vs. Cora                        | 0.05909           | -0.1999 to 0.3181         | No                  | ns             | 0.9913                  |
| Cladonia vs. Hypotrachyna                | -0.07644          | -0.3354 to 0.1825         | No                  | ns             | 0.9678                  |
| Cladonia vs. Peltigera                   | 0.1107            | -0.2319 to 0.4532         | No                  | ns             | 0.9505                  |
| Cladonia vs. Stereocaulon                | 0.04137           | -0.2176 to 0.3003         | No                  | ns             | 0.9988                  |
| Cladonia vs. Sticta                      | -0.01967          | -0.2786 to 0.2393         | No                  | ns             | >0.9999                 |
| Cladonia vs. Usnea                       | 0.2087            | -0.05032 to 0.4676        | No                  | ns             | 0.1866                  |
| Cora vs. Hypotrachyna                    | -0.1355           | -0.4102 to 0.1392         | No                  | ns             | 0.7249                  |
| Cora vs. Peltigera                       | 0.05156           | -0.3031 to 0.4062         | No                  | ns             | 0.9993                  |
| Cora vs. Stereocaulon                    | -0.01772          | -0.2924 to 0.2570         | No                  | ns             | >0.9999                 |
| Cora vs. Sticta                          | -0.07876          | -0.3534 to 0.1959         | No                  | ns             | 0.9721                  |
| Cora vs. Usnea                           | 0.1496            | -0.1251 to 0.4243         | No                  | ns             | 0.6266                  |
| Hypotrachyna vs. Peltigera               | 0.1871            | -0.1675 to 0.5417         | No                  | ns             | 0.6599                  |
| Hypotrachyna vs. Stereocaulon            | 0.1178            | -0.1569 to 0.3925         | No                  | ns             | 0.8334                  |
| Hypotrachyna vs. Sticta                  | 0.05677           | -0.2179 to 0.3315         | No                  | ns             | 0.9949                  |
| Hypotrachyna vs. Usnea                   | 0.2851            | 0.01041 to 0.5598         | Yes                 | *              | 0.0375                  |
| Peltigera vs. Stereocaulon               | -0.06929          | -0.4239 to 0.2853         | No                  | ns             | 0.9962                  |
| Peltigera vs. Sticta                     | -0.1303           | -0.4849 to 0.2243         | No                  | ns             | 0.9115                  |
| Peltigera vs. Usnea                      | 0.09801           | -0.2566 to 0.4526         | No                  | ns             | 0.9767                  |
| Stereocaulon vs. Sticta                  | -0.06103          | -0.3357 to 0.2137         | No                  | ns             | 0.9925                  |
| Stereocaulon vs. Usnea                   | 0.1673            | -0.1074 to 0.4420         | No                  | ns             | 0.4985                  |
| Sticta vs. Usnea                         | 0.2283            | -0.04636 to 0.5030        | No                  | ns             | 0.1597                  |

Alpha

0.05

| Tamhane's T2 multiple comparisons test | Mean Diff. | 95.00% CI of diff. | Significant? | Summary | djusted P Value |
|----------------------------------------|------------|--------------------|--------------|---------|-----------------|
| Cladonia vs. Cora                      | 0.1456     | -2.022 to 2.313    | No           | ns      | >0.9999         |
| Cladonia vs. Hypotrachyna              | -1.214     | -3.277 to 0.8481   | No           | ns      | 0.6389          |
| Cladonia vs. Peltigera                 | -0.04559   | -9.108 to 9.017    | No           | ns      | >0.9999         |
| Cladonia vs. Stereocaulon              | 0.001145   | -2.113 to 2.115    | No           | ns      | >0.9999         |
| Cladonia vs. Sticta                    | -1.064     | -3.689 to 1.562    | No           | ns      | 0.9631          |
| Cladonia vs. Usnea                     | 0.9849     | -0.9874 to 2.957   | No           | ns      | 0.8517          |
| Cora vs. Hypotrachyna                  | -1.36      | -3.559 to 0.8396   | No           | ns      | 0.5348          |
| Cora vs. Peltigera                     | -0.1912    | -8.915 to 8.533    | No           | ns      | >0.9999         |
| Cora vs. Stereocaulon                  | -0.1444    | -2.387 to 2.098    | No           | ns      | >0.9999         |
| Cora vs. Sticta                        | -1.209     | -3.909 to 1.491    | No           | ns      | 0.9118          |
| Cora vs. Usnea                         | 0.8393     | -1.287 to 2.966    | No           | ns      | 0.9711          |
| Hypotrachyna vs. Peltigera             | 1.169      | -8.167 to 10.50    | No           | ns      | 0.9994          |
| Hypotrachyna vs. Stereocaulon          | 1.215      | -0.9323 to 3.363   | No           | ns      | 0.6705          |
| Hypotrachyna vs. Sticta                | 0.1508     | -2.500 to 2.801    | No           | ns      | >0.9999         |
| Hypotrachyna vs. Usnea                 | 2.199      | 0.1862 to 4.212    | Yes          | *       | 0.0268          |
| Peltigera vs. Stereocaulon             | 0.04674    | -8.970 to 9.064    | No           | ns      | >0.9999         |
| Peltigera vs. Sticta                   | -1.018     | -8.161 to 6.126    | No           | ns      | >0.9999         |
| Peltigera vs. Usnea                    | 1.03       | -8.971 to 11.03    | No           | ns      | 0.9999          |
| Stereocaulon vs. Sticta                | -1.065     | -3.738 to 1.609    | No           | ns      | 0.9655          |
| Stereocaulon vs. Usnea                 | 0.9837     | -1.085 to 3.053    | No           | ns      | 0.8727          |
| Sticta vs. Usnea                       | 2.048      | -0.5668 to 4.664   | No           | ns      | 0.1984          |

Alpha

0.05

| Tukey's multiple comparisons t | Mean Diff. | 95.00% CI of diff | Significant? | Summary | Adjusted P Value |
|--------------------------------|------------|-------------------|--------------|---------|------------------|
| Cladonia vs. Cora              | -114.3     | -760.7 to 532.0   | No           | ns      | 0.9978           |
| Cladonia vs. Hypotrachyna      | -365.2     | -1012 to 281.2    | No           | ns      | 0.5859           |
| Cladonia vs. Peltigera         | -477.3     | -1332 to 377.7    | No           | ns      | 0.5993           |
| Cladonia vs. Stereocaulon      | -45.33     | 691.7 to 601.0    | No           | ns      | >0.9999          |
| Cladonia vs. Sticta            | -599.3     | -1246 to 47.04    | No           | ns      | 0.0847           |
| Cladonia vs. Usnea             | 223.5      | 422.8 to 869.1    | No           | ns      | 0.9323           |
| Cora vs. Hypotrachyna          | -250.9     | 936.4 to 434.7    | No           | ns      | 0.9131           |
| Cora vs. Peltigera             | -363       | -1248 to 522.2    | No           | ns      | 0.8601           |
| Cora vs. Stereocaulon          | 69         | 616.6 to 754.0    | No           | ns      | >0.9999          |
| Cora vs. Sticta                | -485       | -1171 to 200.6    | No           | ns      | 0.3207           |
| Cora vs. Usnea                 | 337.9      | -347.7 to 1023    | No           | ns      | 0.726            |
| Hypotrachyna vs. Peltigera     | -112.1     | 997.2 to 772.9    | No           | ns      | 0.9997           |
| Hypotrachyna vs. Stereocaulon  | 319.9      | -365.7 to 1005    | No           | ns      | 0.7728           |
| Hypotrachyna vs. Sticta        | -234.1     | 919.7 to 451.4    | No           | ns      | 0.936            |
| Hypotrachyna vs. Usnea         | 588.7      | -96.87 to 1274    | No           | ns      | 0.1342           |
| Peltigera vs. Stereocaulon     | 432        | -453.1 to 1317    | No           | ns      | 0.7346           |
| Peltigera vs. Sticta           | -122       | -1007 to 763.2    | No           | ns      | 0.9995           |
| Peltigera vs. Usnea            | 700.9      | -184.2 to 1586    | No           | ns      | 0.2025           |
| Stereocaulon vs. Sticta        | -554       | -1240 to 131.6    | No           | ns      | 0.184            |
| Stereocaulon vs. Usnea         | 268.9      | 416.7 to 954.4    | No           | ns      | 0.8834           |
| Sticta vs. Usnea               | 822.9      | 137.3 to 1508     | Yes          | **      | 0.01             |
