# Supplementary material for: The microbiomes of seven lichen genera reveal host specificity, a reduced core community and potential as source of antimicrobials
Source: bioRxiv or medRxiv preprint supplement (doi:10.1101/789032), 2019-10-01
Supplement: Supplementary file [file media-3.pdf]

| GenBank-ID  | Phylum         | Order            | Lichen | Continent  | Country          | Biome     |
|-------------|----------------|------------------|--------|------------|------------------|-----------|
| MG996731_1  | Proteobacteria | Rhizobiales      | Yes    | Europe     | Russia           | NA        |
| GU300236_1  | Proteobacteria | Rhizobiales      | No     | America    | Canada           | Forest    |
| JX967285_1  | NA             | NA               | Yes    | Europe     | Norway           | Arctic    |
| HQ333277_1  | NA             | NA               | No     | Asia       | China            | Glacier   |
| HM240934_1  | NA             | NA               | No     | NA         | NA               | Desert    |
| LN614695_1  | Proteobacteria | Rhizobiales      | No     | America    | USA              | Glacier   |
| JX967294_1  | Proteobacteria | Rhizobiales      | Yes    | Europe     | Norway           | Arctic    |
| AM940729_1  | Proteobacteria | Rhodospirillales | No     | Europe     | Norway           | Arctic    |
| JN023390_1  | NA             | NA               | Yes    | America    | Mexico           | Grassland |
| LN929548_1  | NA             | NA               | No     | America    | Chile            | Desert    |
| JX098367_1  | NA             | NA               | No     | America    | Chile            | Desert    |
| JN023294_1  | NA             | NA               | Yes    | America    | Mexico           | Grassland |
| FR749823_1  | Acidobacteria  | NA               | No     | Antarctica | NA               | Antarctic |
| KT752896_1  | Acidobacteria  | NA               | No     | Europe     | Norway           | Glacier   |
| EU083407_1  | NA             | NA               | No     | Europe     | Switzerland      | Glacier   |
| JQ381812_2  | NA             | NA               | No     | America    | USA              | NA        |
| NR_118023_1 | Acidobacteria  | Acidobacteriales | No     | Europe     | Finland          | Tundra    |
| HQ595216_1  | Acidobacteria  |                  | No     | Europe     | Norway           | Arctic    |
| JQ480554_1  | NA             | NA               | No     | Europe     | Switzerland      | Glacier   |
| EF220623_1  | Proteobacteria | NA               | No     | America    | Falkland Islands | Antarctic |
| KU219090_1  | Cyanobacteria  | NA               | No     | America    | Brazil           | Forest    |
| EU861940_1  | NA             | NA               | No     | America    | USA              | Tundra    |
| EF221408_1  | Proteobacteria | NA               | No     | Antarctica | NA               | Antarctic |
| HF546516_1  | Acidobacteria  | NA               | Yes    | Europe     | Italy            | Glacier   |
| HF546512_1  | Proteobacteria | Rhodospirillales | Yes    | Europe     | Italy            | Glacier   |
| HF546509_1  | Cyanobacteria  | NA               | Yes    | Europe     | Italy            | Glacier   |
| FJ475466_1  | Proteobacteria | Rhodospirillales | No     | Europe     | Sweden           | Forest    |
| KX467876_1  | Proteobacteria | Rhizobiales      | No     | Europe     | Norway           | Arctic    |
| MH530970_1  | NA             | NA               | No     | Australia  | New Zeland       | Forest    |
| JF907343_1  | NA             | NA               | No     | America    | Argentina        | Antarctic |
| KU219013_1  | Cyanobacteria  | NA               | No     | America    | Brazil           | Forest    |
| JX967352_1  | NA             | NA               | Yes    | Europe     | Norway           | Arctic    |
| MF423481_1  | Cyanobacteria  | Nostocales       | Yes    | America    | USA              | Forest    |
| AF428513_1  | Cyanobacteria  | NA               | Yes    | America    | USA              | Desert    |
| Otu00008    | Proteobacteria | Rhizobiales      | Yes    | America    | Colombia         | Paramo    |
| Otu00012    | Proteobacteria | Rhizobiales      | Yes    | America    | Colombia         | Paramo    |
| Otu00015    | Proteobacteria | Rhodospirillales | Yes    | America    | Colombia         | Paramo    |
| Otu00016    | Proteobacteria | Sphingomonadales | Yes    | America    | Colombia         | Paramo    |
| Otu00017    | Acidobacteria  | Acidobacteriales | Yes    | America    | Colombia         | Paramo    |
| Otu00018    | Acidobacteria  | Acidobacteriales | Yes    | America    | Colombia         | Paramo    |
| Otu00019    | Proteobacteria | Rhizobiales      | Yes    | America    | Colombia         | Paramo    |
| Otu00026    | Proteobacteria | Rhizobiales      | Yes    | America    | Colombia         | Paramo    |
| Otu00032    | Proteobacteria | Rhodospirillales | Yes    | America    | Colombia         | Paramo    |
| Otu00036    | Cyanobacteria  | NA               | Yes    | America    | Colombia         | Paramo    |
| Otu00037    | Proteobacteria | Rhodospirillales | Yes    | America    | Colombia         | Paramo    |
| Otu00041    | Acidobacteria  | Acidobacteriales | Yes    | America    | Colombia         | Paramo    |
| Otu00042    | Proteobacteria | Rhodospirillales | Yes    | America    | Colombia         | Paramo    |
| Otu00047    | Proteobacteria | Rhodospirillales | Yes    | America    | Colombia         | Paramo    |
| Otu00062    | Proteobacteria | Rhizobiales      | Yes    | America    | Colombia         | Paramo    |
| Otu00112    | Acidobacteria  | Acidobacteriales | Yes    | America    | Colombia         | Paramo    |
