# Supplementary material for: The microbiomes of seven lichen genera reveal host specificity, a reduced core community and potential as source of antimicrobials
Source: bioRxiv or medRxiv preprint supplement (doi:10.1101/789032), 2019-10-01
Supplement: Supplementary file [file media-4.pdf]

| Lichen              | Code     | Medium | Growth time | Macroscopic Description |         |            |           | Bioactive | Against                                      | PCR 16S rRNA<br>(27F-1492R) | Microorganism |
|---------------------|----------|--------|-------------|-------------------------|---------|------------|-----------|-----------|----------------------------------------------|-----------------------------|---------------|
|                     |          |        |             | Color                   | Surface | Shape      | Edge      |           |                                              |                             |               |
| <i>Bacidia</i>      | PN.F6.1  | ISP2   | 24h         | Orange                  | Smooth  | Irregular  | Irregular | Yes       | <i>C. albicans</i>                           | Positive                    | Bacteria      |
|                     | PN.F6.2  | ISP2   | 3 Days      | Beige                   | Rough   | Irregular  | Irregular | No        | NA                                           | Positive                    | Bacteria      |
|                     | PN.F6.3  | DIFCO  | 24h         | White                   | Smooth  | Irregular  | Irregular | Yes       | <i>S. aureus, A. baumannii</i>               | Positive                    | Bacteria      |
| <i>Cladonia</i>     | PN.F6.4  | DIFCO  | >5 Days     | White                   | Smooth  | Irregular  | Irregular | No        | NA                                           | Positive                    | Bacteria      |
|                     | PN.C2    | ISP2   | >5 Days     | White                   | Rough   | Punctiform | Regular   | No        | NA                                           | Positive                    | Bacteria      |
|                     | PN.C2.0  | ISP2   | >5 Days     | White                   | Rough   | Circular   | Regular   | No        | NA                                           | Positive                    | Bacteria      |
|                     | PN.C2.2  | DIFCO  | >5 Days     | Beige                   | Rough   | Irregular  | Irregular | No        | NA                                           | Positive                    | Bacteria      |
|                     | PN.C2.3  | ISP2   | >5 Days     | Pink                    | Smooth  | Irregular  | Irregular | No        | NA                                           | Positive                    | Bacteria      |
|                     | PN.C2.4  | GAUSE  | >5 Days     | White                   | Smooth  | Circular   | Regular   | No        | NA                                           | Positive                    | Bacteria      |
|                     | PN.C2.5  | ISP2   | >5 Days     | Beige                   | Rough   | Circular   | Regular   | No        | NA                                           | Positive                    | Bacteria      |
|                     | PN.D1.1  | ISP2   | >5 Days     | Green                   | Smooth  | Punctiform | Irregular | No        | NA                                           | Positive                    | Bacteria      |
|                     | PN.D1.2  | ISP2   | >5 Days     | Brown                   | Smooth  | Irregular  | Irregular | No        | NA                                           | Positive                    | Bacteria      |
|                     | PN.E1.1  | DIFCO  | >5 Days     | Yellow                  | Smooth  | Circular   | Regular   | No        | NA                                           | Positive                    | Bacteria      |
| <i>Cora</i>         | PN.E1.2  | ISP2   | >5 Days     | Green                   | Smooth  | Irregular  | Regular   | No        | NA                                           | Positive                    | Bacteria      |
|                     | PN.F1.1  | ISP2   | 72h         | Yellow                  | Rough   | Irregular  | Irregular | No        | NA                                           | Positive                    | Bacteria      |
|                     | PN.F1.3  | DIFCO  | >5 Days     | Pink                    | Rough   | Punctiform | Regular   | No        | NA                                           | Positive                    | Bacteria      |
|                     | PN.F1.4  | DIFCO  | >5 Days     | Pink                    | Rough   | Irregular  | Irregular | Yes       | <i>A.baumannii</i>                           | Positive                    | Bacteria      |
|                     | PN.F1.6  | DIFCO  | >5 Days     | No color                | Rough   | Punctiform | Regular   | No        | NA                                           | Positive                    | Bacteria      |
|                     | PN.F1.9  | GAUSE  | >5 Days     | White                   | Smooth  | Irregular  | Irregular | No        | NA                                           | Positive                    | Bacteria      |
| <i>Hypotrachyna</i> | PN.C6.2  | DIFCO  | 48h         | White                   | Smooth  | Irregular  | Regular   | No        | NA                                           | Positive                    | Bacteria      |
|                     | PN.F3.1  | ISP2   | >5 Days     | Beige                   | Smooth  | Irregular  | Irregular | No        | NA                                           | Positive                    | Bacteria      |
|                     | PN.F3.2  | DIFCO  | >5 Days     | Pink                    | Rough   | Punctiform | Regular   | No        | NA                                           | Positive                    | Bacteria      |
| <i>Peltigera</i>    | PN.F4.1  | ISP2   | >5 Days     | Orange                  | Rough   | Punctiform | Irregular | No        | NA                                           | Positive                    | Bacteria      |
|                     | PN.F4.10 | DIFCO  | >5 Days     | White                   | Smooth  | Punctiform | Regular   | No        | NA                                           | Positive                    | Bacteria      |
|                     | PN.F4.3  | ISP2   | >5 Days     | Brown                   | Smooth  | Irregular  | Irregular | Yes       | <i>S. aureus, C. albicans, P. aeruginosa</i> | Positive                    | Bacteria      |
|                     | PN.F4.7  | DIFCO  | >5 Days     | Beige                   | Smooth  | Irregular  | Irregular | Yes       | <i>S. aureus, P. aeruginosa</i>              | Positive                    | Bacteria      |
| <i>Psoroma</i>      | PN.F4.9  | DIFCO  | >5 Days     | Orange                  | Smooth  | Irregular  | Irregular | No        | NA                                           | Positive                    | Bacteria      |
|                     | PN.C4.3  | ISP2   | >5 Days     | White                   | Smooth  | Punctiform | Irregular | Yes       | <i>K. pneumoniae</i>                         | Positive                    | Bacteria      |
|                     | PN.C4.4  | DIFCO  | >5 Days     | Pink                    | Rough   | Punctiform | Irregular | No        | NA                                           | Positive                    | Bacteria      |
| <i>Stereocaulon</i> | PN.A3.1  | DIFCO  | >5 Days     | White                   | Rough   | Irregular  | Irregular | No        | NA                                           | Positive                    | Bacteria      |
|                     | PN.A3.3  | ISP2   | >5 Days     | Cream                   | Rough   | Irregular  | Irregular | No        | NA                                           | Positive                    | Bacteria      |
|                     | PN.A3.4  | DIFCO  | >5 Days     | Yellow                  | Smooth  | Punctiform | Regular   | No        | NA                                           | Positive                    | Bacteria      |
|                     | PN.A3.5  | ISP2   | >5 Days     | Beige                   | Smooth  | Punctiform | Regular   | No        | NA                                           | Positive                    | Bacteria      |
|                     | PN.B1.3  | ISP2   | >5 Days     | Pink                    | Smooth  | Punctiform | Irregular | No        | NA                                           | Positive                    | Bacteria      |
|                     | PN.B1.4  | ISP2   | >5 Days     | Yellow                  | Rough   | Circular   | Irregular | No        | NA                                           | Positive                    | Bacteria      |
|                     | PN.D2.2  | DIFCO  | >5 Days     | White                   | Smooth  | Irregular  | Irregular | No        | NA                                           | Positive                    | Bacteria      |
| <i>Sticta</i>       | PN.F5.2  | DIFCO  | >5 Days     | White                   | Smooth  | Punctiform | Irregular | Yes       | <i>C.albicans, A. baumannii</i>              | Positive                    | Bacteria      |
|                     | PN.C3.1  | ISP2   | 72h         | Yellow                  | Rough   | Punctiform | Irregular | Yes       | <i>S. enterica, E.coli, P. aeuriginosa</i>   | Positive                    | Bacteria      |
|                     | PN.C3.2  | DIFCO  | >5 Days     | Red                     | Smooth  | Punctiform | Regular   | Yes       | <i>C. albicans</i>                           | Positive                    | Bacteria      |
|                     | PN.C3.3  | ISP2   | 48h         | Beige                   | Rough   | Circular   | Regular   | No        | NA                                           | Positive                    | Bacteria      |
|                     | PN.D3.1  | DIFCO  | >5 Days     | Red                     | Rough   | Irregular  | Regular   | No        | NA                                           | Positive                    | Bacteria      |
|                     | PN.D3.3  | ISP2   | >5 Days     | Yellow                  | Smooth  | Irregular  | Irregular | No        | NA                                           | Positive                    | Bacteria      |
|                     | PN.D3.4  | DIFCO  | >5 Days     | Yellow                  | Smooth  | Irregular  | Irregular | No        | NA                                           | Positive                    | Bacteria      |
| <i>Usnea</i>        | PN.A2.1  | DIFCO  | >5 Days     | Pink                    | Smooth  | Punctiform | Irregular | No        | NA                                           | Positive                    | Bacteria      |
|                     | PN.D4.1  | ISP2   | >5 Days     | Beige                   | Rough   | Circular   | Regular   | No        | NA                                           | Positive                    | Bacteria      |
|                     | PN.D4.2  | ISP2   | >5 Days     | White                   | Rough   | Irregular  | Regular   | No        | NA                                           | Positive                    | Bacteria      |

ISP2: Streptomyces Project Medium-2  
DIFCO: Actinomycete Isolation Agar  
GAUSE: Gause Synthetic Agar

Description code name: PN  
corresponds to Nevados Park; The  
following letter represents the  
sublocation point with the number of  
lichen thalli; Following number  
represents the numeration for the  
isolate

| Lichen       | Code        | Medium  | Growth time | Macroscopic Description |            |             |           | Bioactive | Against                                                   | PCR 16S rRNA (27F-1492R) | PCR ITS (ITS4-ITS5) | Microorganism |
|--------------|-------------|---------|-------------|-------------------------|------------|-------------|-----------|-----------|-----------------------------------------------------------|--------------------------|---------------------|---------------|
|              |             |         |             | Color                   | Surface    | Shape       | Edge      |           |                                                           |                          |                     |               |
| Cladonia     | PC.L1.2     | DIFCO   |             | NA                      | NA         | NA          | NA        | No        | NA                                                        | Negative                 | Positive            | Fungi         |
|              | PC.L1.3     | DIFCO   |             | NA                      | NA         | NA          | NA        | No        | NA                                                        | Negative                 | Positive            | Fungi         |
|              | PC.A4.4     | ISP2    | 4 Days      | White                   | Rough      | Irregular   | Irregular | Yes       | <i>S. aureus, A. baumannii</i>                            | Positive                 |                     | Bacteria      |
|              | PC.A4.5     | GAUSE   |             | White                   | Rough      | Circular    | Irregular | Yes       | <i>S. aureus, A. baumannii</i>                            | Positive                 |                     | Bacteria      |
| Yoshiuriella | PC.C1.1     | ISP2    |             | White                   | Rough      | Circular    | Irregular | Yes       | <i>K. pneumoniae</i>                                      | Positive                 |                     | Bacteria      |
|              | PC.C1.7     | GAUSE-O | >5 Days     | White                   | Rough      | Circular    | Regular   | No        | NA                                                        | Positive                 |                     | Bacteria      |
|              | PC.C1.8     | GAUSE   |             | NA                      | NA         | NA          | NA        | No        | NA                                                        | Positive                 |                     | Bacteria      |
|              | PC.C1.9     | GAUSE   |             | NA                      | NA         | NA          | NA        | No        | NA                                                        | Negative                 | Positive            | Fungi         |
|              | PC.D1.5     | ISP2    | 4 Days      | Yellow                  | Smooth     | Punctiform  | Regular   | No        | NA                                                        | Positive                 |                     | Bacteria      |
|              | PC.D1.6     | GAUSE-O | 4 Days      | White                   | Rough      | Circular    | Irregular | No        | NA                                                        | Positive                 |                     | Bacteria      |
|              | PC.D1.7     | GAUSE   |             | Cream                   | Rough      | Circular    | Regular   | No        | NA                                                        | Positive                 |                     | Bacteria      |
|              | PC.D1.8     | ISP2    |             | NA                      | NA         | NA          | NA        | Yes       | <i>S. aureus, A. baumannii</i>                            | Positive                 |                     | Bacteria      |
|              | PC.D1.10    | GAUSE-O |             | White                   | Rough      | Circular    | Regular   | No        | NA                                                        | Positive                 |                     | Bacteria      |
|              | PC.D1.11    | DIFCO   |             | Brown                   | Rough      | Circular    | Irregular | No        | NA                                                        | Positive                 |                     | Bacteria      |
| Slicta       | PC.E2.3     | ISP2    | >5 Days     | White                   | Rough      | Irregular   | Irregular | No        | NA                                                        | Positive                 |                     | Bacteria      |
|              | PC.E2.4     | ISP2    | >5 Days     | White                   | Rough      | Irregular   | Irregular | NA        | NA                                                        | Positive                 |                     | Bacteria      |
|              | PC.E2.5     | ISP2    |             | White                   | Rough      | Circular    | Irregular | No        | NA                                                        | Positive                 |                     | Bacteria      |
|              | PC.E2.6     | ISP2    |             | NA                      | NA         | NA          | NA        | No        | NA                                                        | Positive                 |                     | Bacteria      |
|              | PC.E2.7     | DIFCO   |             | White                   | Rough      | Circular    | Irregular | Yes       | <i>C. albicans</i>                                        | Positive                 |                     | Bacteria      |
|              | PC.E2.8     | GAUSE   |             | White                   | Rough      | Punctiform  | Irregular | No        | NA                                                        | Positive                 |                     | Bacteria      |
|              | PC.E2.9     | GAUSE   |             | White                   | Rough      | Circular    | Irregular | No        | NA                                                        | Positive                 |                     | Bacteria      |
|              | PC.A5.7     | ISP2    |             | Brown                   | Rough      | Circular    | Irregular | Yes       | <i>S. aureus, A. baumannii</i>                            | Negative                 | Positive            | Fungi         |
|              | PC.A5.8     | ISP2    |             | NA                      | NA         | NA          | NA        | Yes       | <i>S. aureus, A. baumannii</i>                            | Positive                 |                     | Bacteria      |
|              | Lobariella* | PC.G1.1 | DIFCO       |                         | NA         | NA          | NA        | NA        | No                                                        | NA                       | Negative            | Positive      |
| PC.G1.2      |             | DIFCO   |             | Black                   | Rough      | Irregular   | Irregular | No        | NA                                                        | Negative                 | Positive            | Fungi         |
| PC.G1.4      |             | DIFCO   |             | NA                      | NA         | NA          | NA        | No        | NA                                                        | Positive                 |                     | Bacteria      |
| PC.B1.1      |             | ISP2    | >5 Days     | Cream                   | Smooth     | Circular    | Regular   | No        | NA                                                        | Positive                 |                     | Bacteria      |
| PC.B1.2      |             | DIFCO   |             | NA                      | NA         | NA          | NA        | No        | NA                                                        | Positive                 |                     | Bacteria      |
| PC.G2.1      |             | DIFCO   |             | White                   | Rough      | Circular    | Irregular | Yes       | <i>A.baumannii</i>                                        | Positive                 |                     | Bacteria      |
| PC.G2.2      |             | ISP2    |             | Green                   | Smooth     | Circular    | Regular   | No        | NA                                                        | Positive                 |                     | Bacteria      |
| PC.G2.3      |             | ISP2    |             | Cream                   | Smooth     | Irregular   | Irregular | No        | NA                                                        | Negative                 | Positive            | Fungi         |
| PC.H3.10     |             | ISP2    | 4 Days      | Brown                   | Rough      | Irregular   | Irregular | No        | NA                                                        | Positive                 |                     | Bacteria      |
| PC.H3.11     |             | ISP2    | 4 Days      | Cream                   | Rough      | Punctiform  | Irregular | Yes       | <i>S. aureus, A. baumannii, C. albicans</i>               | NA                       |                     | Bacteria      |
| Hypotrachyna | PC.H3.12    | ISP2    |             | Yellow                  | Rough      | Circular    | Irregular | Yes       | <i>S. aureus, A. baumannii</i>                            | Positive                 |                     | Bacteria      |
|              | PC.H3.13    | ISP2    |             | Yellow                  | Smooth     | Punctiform  | Regular   | Yes       | <i>S. aureus, A. baumannii</i>                            | Positive                 |                     | Bacteria      |
|              | PC.H3.6     | DIFCO   | 4 Days      | Brown                   | Rough      | Circular    | Irregular | No        | NA                                                        | Positive                 |                     | Bacteria      |
|              | PC.H3.7     | GAUSE   | 4 Days      | Brown                   | Rough      | Irregular   | Irregular | No        | NA                                                        | Positive                 |                     | Bacteria      |
|              | PC.H3.8     | ISP2    |             | Brown                   | Rough      | Irregular   | Irregular | No        | NA                                                        | Positive                 |                     | Bacteria      |
|              | PC.H3.9     | ISP2    | 4 Days      | White                   | Rough      | Punctiform  | Irregular | Yes       | <i>C. albicans</i>                                        | Positive                 |                     | Bacteria      |
|              | PC.H3.14    | DIFCO   |             | Yellow                  | Rough      | Circular    | Irregular | Yes       | <i>A.baumannii</i>                                        | Positive                 |                     | Bacteria      |
|              | PC.H3.15    | DIFCO   | >5 Days     | White                   | Rough      | Circular    | Irregular | No        | NA                                                        | Positive                 |                     | Bacteria      |
|              | PC.H3.16    | ISP2    |             | Yellow                  | Rough      | Circular    | Irregular | Yes       | <i>S. aureus, A. baumannii, C. albicans</i>               | Positive                 |                     | Bacteria      |
|              | PC.H3.17    | GAUSE   |             | Yellow                  | Rough      | Punctiform  | Irregular | Yes       | <i>S. aureus, A. baumannii</i>                            | Positive                 |                     | Bacteria      |
| Cora         | PC.H3.18    | DIFCO   |             | NA                      | NA         | NA          | NA        | Yes       | <i>S. aureus, A. baumannii</i>                            | Positive                 |                     | Bacteria      |
|              | PC.H3.19    | GAUSE-O |             | NA                      | NA         | NA          | NA        | Yes       | <i>S. aureus, A. baumannii, C. albicans, F. oxysporum</i> | Positive                 |                     | Bacteria      |
|              | PC.N3.10    | DIFCO   | 4 Days      | Yellow                  | Smooth     | Punctiform  | Irregular | No        | NA                                                        | Positive                 |                     | Bacteria      |
|              | PC.H1.1     | ISP2    | >5 Days     | Cream                   | Smooth     | Irregular   | Irregular | No        | NA                                                        | Negative                 | Positive            | Fungi         |
|              | PC.H2.1     | DIFCO   | >5 Days     | Yellow                  | Rough      | Punctiform  | Irregular | Yes       | <i>S. aureus</i>                                          | Positive                 |                     | Bacteria      |
|              | PC.H2.2     | ISP2    |             | Orange                  | Smooth     | Irregular   | Irregular | Yes       | <i>S. aureus, A. baumannii</i>                            | Negative                 | Positive            | Fungi         |
|              | PC.H2.3     | ISP2    |             | Cream                   | Smooth     | Irregular   | Irregular | No        | NA                                                        | Positive                 |                     | Bacteria      |
|              | PC.I1.1     | DIFCO   |             | White                   | Smooth     | Punctiform  | Regular   | Yes       | <i>C. albicans</i>                                        | Positive                 |                     | Bacteria      |
|              | PC.L2.1     | GAUSE-O |             | NA                      | NA         | NA          | NA        | Yes       | <i>F. oxysporum</i>                                       | Positive                 |                     | Bacteria      |
|              | PC.A3.3     | DIFCO   | 4 Days      | White                   | Rough      | Circular    | Irregular | No        | NA                                                        | Positive                 |                     | Bacteria      |
| Stereocaulon | PC.A3.4     | ISP2    |             | Cream                   | Smooth     | Irregular   | Irregular | No        | NA                                                        | Positive                 |                     | Bacteria      |
|              | PC.L3.2     | ISP2    |             | White                   | Rough      | Irregular   | Irregular | No        | NA                                                        | Positive                 |                     | Bacteria      |
|              | PC.L3.3     | ISP2    |             | White                   | Rough      | Punctiform  | Irregular | No        | NA                                                        | Positive                 |                     | Bacteria      |
|              | PC.L3.5     | ISP2    |             | White                   | Rough      | Punctiform  | Irregular | No        | NA                                                        | Positive                 |                     | Bacteria      |
|              | PC.L3.6     | ISP2    |             | White                   | Rough      | Punctiform  | Irregular | No        | NA                                                        | Positive                 |                     | Bacteria      |
|              | PC.L3.8     | DIFCO   |             | White                   | Rough      | Circular    | Regular   | No        | NA                                                        | Positive                 |                     | Bacteria      |
|              | PC.L3.7     | ISP2    |             | White                   | Rough      | Punctiform  | Irregular | No        | NA                                                        | Positive                 |                     | Bacteria      |
|              | PC.L3.9     | DIFCO   |             | NA                      | NA         | NA          | NA        | No        | NA                                                        | Positive                 |                     | Bacteria      |
|              | PC.L3.10    | DIFCO   |             | NA                      | NA         | NA          | NA        | No        | NA                                                        | Positive                 |                     | Bacteria      |
|              | PC.A1.4     | ISP2    |             | Yellow                  | Smooth     | Irregular   | Irregular | No        | NA                                                        | Positive                 |                     | Bacteria      |
| Peltigera    | PC.N4.4     | DIFCO   | 72h         | White                   | Rough      | Irregular   | Irregular | Yes       | <i>S. aureus</i>                                          | Positive                 |                     | Bacteria      |
|              | PC.N4.6     | DIFCO   |             | Cream                   | Rough      | Irregular   | Irregular | No        | NA                                                        | Positive                 |                     | Bacteria      |
|              | PC.N4.7     | ISP2    | 48h         | Cream                   | Rough      | Punctiform  | Irregular | No        | NA                                                        | Positive                 |                     | Bacteria      |
|              | PC.N4.8     | DIFCO   | 72h         | Cream                   | Rough      | Punctiform  | Irregular | Yes       | <i>A.baumannii</i>                                        | Positive                 |                     | Bacteria      |
|              | PC.N4.9     | ISP2    | 4 Days      | White                   | Rough      | Irregular   | Irregular | No        | NA                                                        | Positive                 |                     | Bacteria      |
|              | PC.C3.17    | GAUSE   |             | Yellow                  | Rough      | Punctiform  | Irregular | No        | NA                                                        | Positive                 |                     | Bacteria      |
|              | PC.C3.18    | ISP2    | 72h         | Brown                   | Rough      | Filamentous | Irregular | Yes       | <i>S. aureus, C. albicans</i>                             | Negative                 | Positive            | Fungi         |
|              | PC.C3.19    | GAUSE-O |             | White                   | Rough      | Circular    | Irregular | No        | NA                                                        | Positive                 |                     | Bacteria      |
|              | PC.C3.20    | DIFCO   |             | Pink                    | Rough      | Irregular   | Irregular | Yes       | <i>S. aureus, A. baumannii</i>                            | Positive                 |                     | Bacteria      |
|              | PC.C3.21    | DIFCO   |             | Yellow                  | Rough      | Punctiform  | Irregular | Yes       | <i>S. aureus, A. baumannii, C. albicans</i>               | Positive                 |                     | Bacteria      |
| PC.C3.24     | Difco (G)   |         | White       | Rough                   | Punctiform | Irregular   | No        | NA        | Positive                                                  |                          | Bacteria            |               |
| PC.C3.25     | GAUSE       |         | NA          | NA                      | NA         | NA          | No        | NA        | Positive                                                  |                          | Bacteria            |               |

\*Due to small amount of lichen thalli, the sample genera could not be thoroughly corroborate

DIFCO: Actinomyces Isolation Agar  
GAUSE: Gause Synthetic Agar  
GAUSE-O: Gause Oligotrophic Agar  
ISP2: Streptomyces Project Medium-2

Description code name: PC  
corresponds to Chingaza Park; The following letter represents the subcollection point with the number of lichen thalli; Following number represents the numeration for the isolate
